# Supplementary material
Source: Royal Society of Chemistry journal article supplement (doi:10.1039/d6im00093b)
Supplement: d6im00093b1.pdf [file d6im00093b1.pdf]

## Supporting Information

### **Zeolite-Confined Ionic Liquid Enables On-Demand Active Bromine Generation for Thermally Robust and Reduced-Dosage Antimicrobial Materials**

Jingkun Zhang <sup>a, b</sup>, Hao Ling <sup>c</sup>, Haidi Liu <sup>a, b</sup>, Yiyang Gong <sup>a, d</sup>, Guangxin Ma <sup>a, b</sup>, Ning Han <sup>a, b</sup>, Hongyan He <sup>a, b\*</sup>, Yunfa Chen <sup>a, b\*</sup>

<sup>a</sup> State Key Laboratory of Mesoscience and Engineering, Institute of Process Engineering, Chinese Academy of Sciences, Beijing 100190, China

<sup>b</sup> Center of Materials Science and Optoelectronics Engineering, University of the Chinese Academy of Sciences, Beijing 100049, China

<sup>c</sup> Beijing National Laboratory for Condensed Matter Physics, Institute of Physics, Chinese Academy of Sciences, Beijing 100190, China

<sup>d</sup> School of Materials Science and Engineering, Shenyang University of Chemical Technology, Shenyang, Liaoning, 110142, China

\* Corresponding authors. [hyhe@ipe.ac.cn](mailto:hyhe@ipe.ac.cn), [chenyf@ipe.ac.cn](mailto:chenyf@ipe.ac.cn) (Yunfa Chen)

# 1. Experimental section

## 1.1. Material characterization

The N<sub>2</sub> adsorption-desorption isotherms of the samples were obtained by specific surface analyzer (SSA-3700, China), and the samples were degassed at 120°C for 10 hours before the analysis. The morphology images were collected by scanning electron microscopy (SEM, JSM-7800 (Prime), Japan). Crystal structure was measured by XRD (Smartlab (9), Japan) in continuous mode at a speed of 1°/min. Fourier transform infrared (FTIR) spectrometer (Vertex 70, Germany) was used to determine the molecular structures of the samples. The chemical composition was measured by X-ray photoelectron spectrometer (XPS, ESCALAB 250Xi, America). The EPR spectra of DMPO captured reactive oxygen species were measured with EMXplus-9.5/12 (America). The <sup>27</sup>Al MAS NMR spectra were recorded on an 600WB spectrometer (Bruker, Switzerland), and Al (NO<sub>3</sub>)<sub>3</sub> solutions were used as reference for the chemical shifts for <sup>27</sup>Al MAS NMR. Fourier-transform infrared spectra of adsorbed pyridine (Py-IR) were collected on Tensor 27 FT-IR spectrometer from Bruker. Specifically, the reduced sample was pressed into a pellet (diameter: 13 mm, weight: ca. 30 mg) and activated at 673 K for 90 min under vacuum of 10<sup>-2</sup> Pa, and then the IR spectra were recorded at room temperature and 150°C. Pyridine vapor was introduced into the sample cell at room temperature for 30 min, followed by evacuation at 673 K for 30 min. Then, the spectra were recorded after evacuation. The spectra of adsorbed pyridine species can be obtained by subtracting the background spectra.

## 1.2. SEM images of bacterial morphology

The bacteria morphology was examined based on SEM characterization. After the bacteria were mixed with antibacterial materials 30 min, the bacteria were collected and fixed in glutaraldehyde aqueous solution (2.5%) overnight. Then the bacteria were dehydrated sequentially with 10, 30, 50, 70, 90, and 100% ethanol solutions for 15 min,

respectively. After natural drying, the bacteria were sputter-coated with platinum, and then observed by SEM.

## 2. Supplementary Figures and Tables

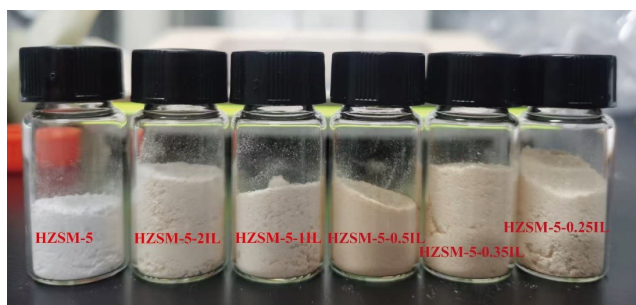

**Figure S1.** Color of HZSM-5-nIL composites.

**Table S1.** The specific surface area and pore volume of the samples.

| Samples       | BET surface area<br>(m <sup>2</sup> /g) | Pore volume<br>(cm <sup>3</sup> /g) | Dpore (nm) |
|---------------|-----------------------------------------|-------------------------------------|------------|
| HZSM-5        | 316.801                                 | 0.1638                              | 2.00       |
| HZSM-5-0.25IL | 2.444                                   | 0.024                               | 35.16      |
| HZSM-5-0.35IL | 2.338                                   | 0.019                               | 27.91      |
| HZSM-5-0.5IL  | 2.184                                   | 0.018                               | 28.3       |
| HZSM-5-1IL    | 2.218                                   | 0.018                               | 28.57      |
| HZSM-5-2IL    | 2.315                                   | 0.019                               | 27.18      |

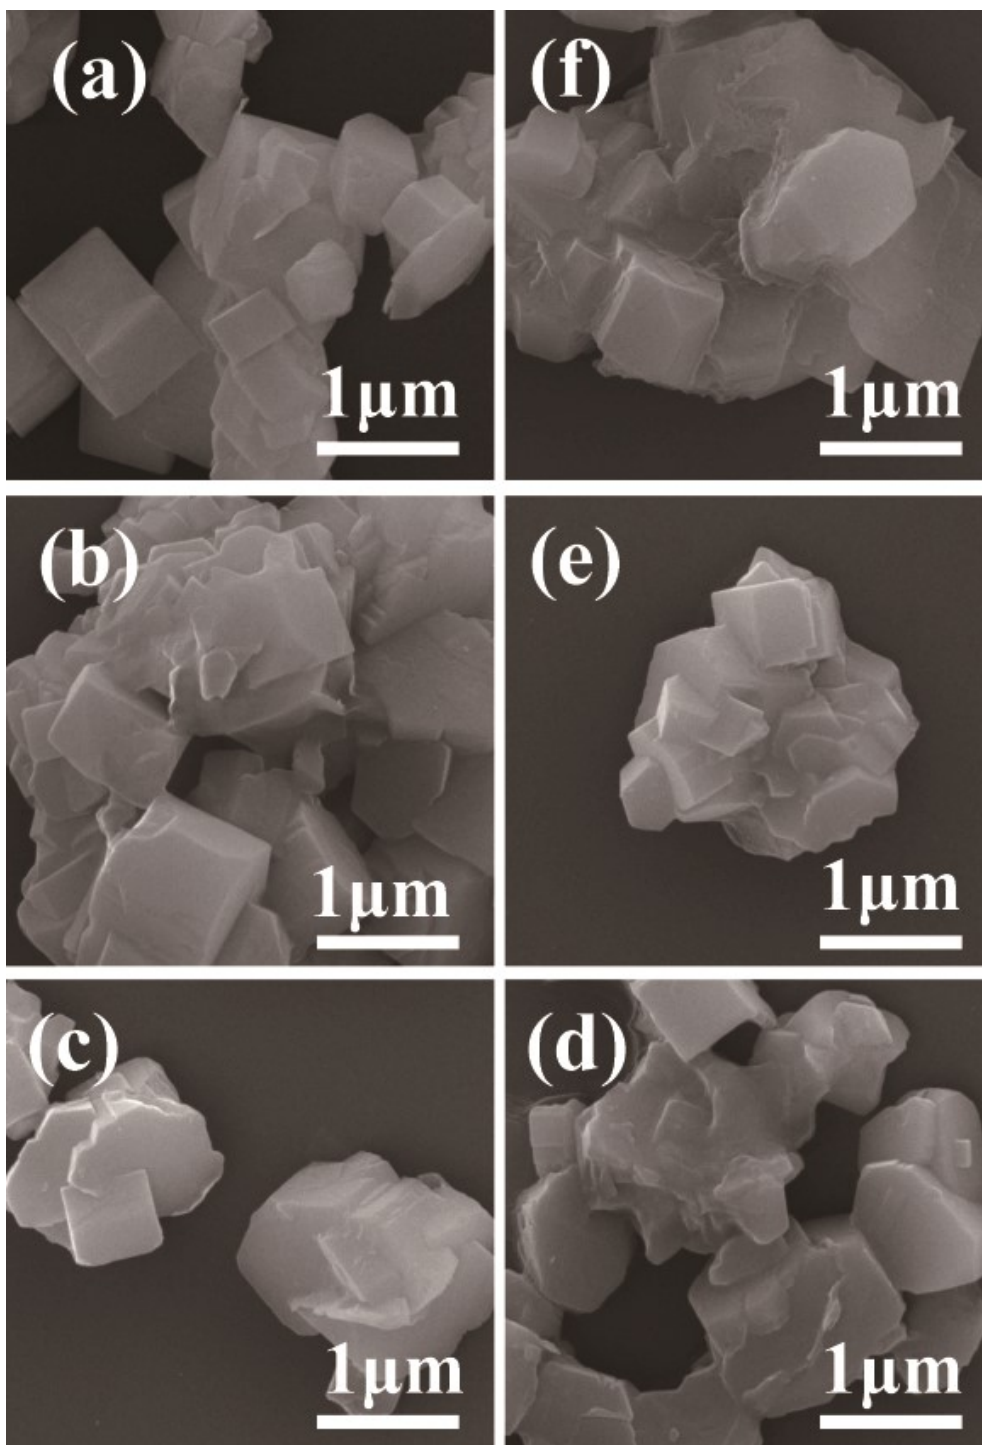

**Figure S2.** SEM images of HZSM-5-niL composites.

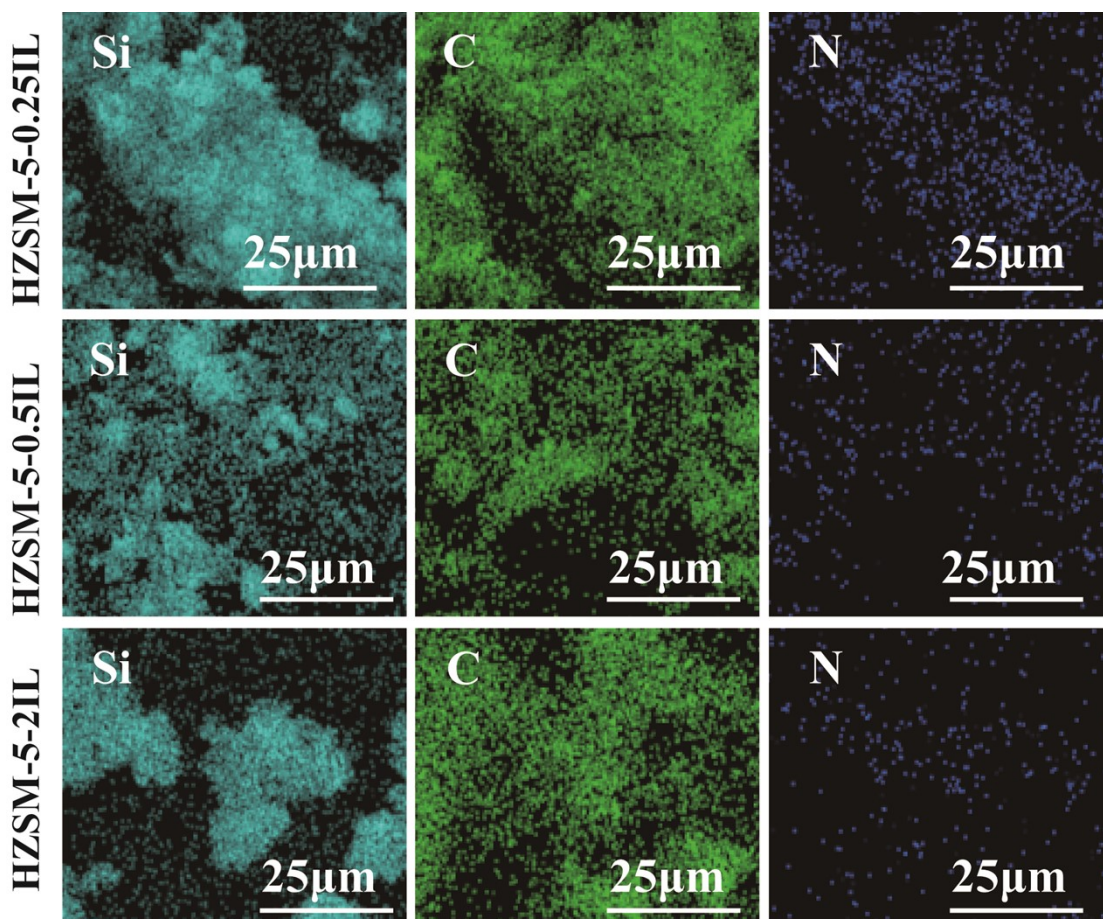

Figure S3. SEM-EDS mapping of HZSM-5-nIL composites.

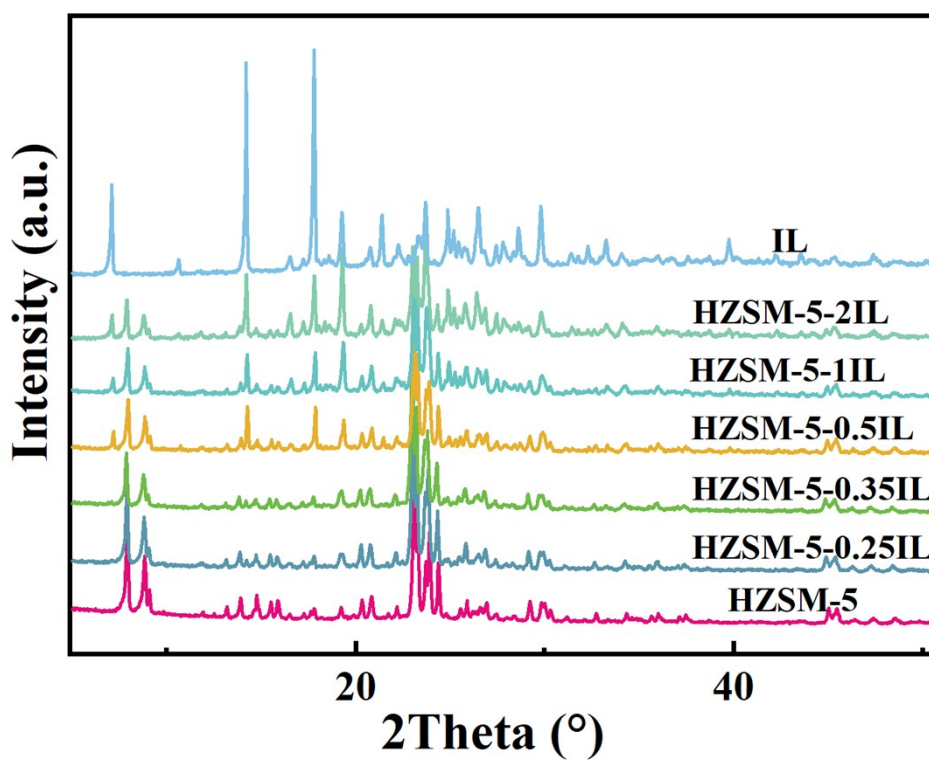

Figure S4. XRD patterns of HZSM-5-nIL composites.

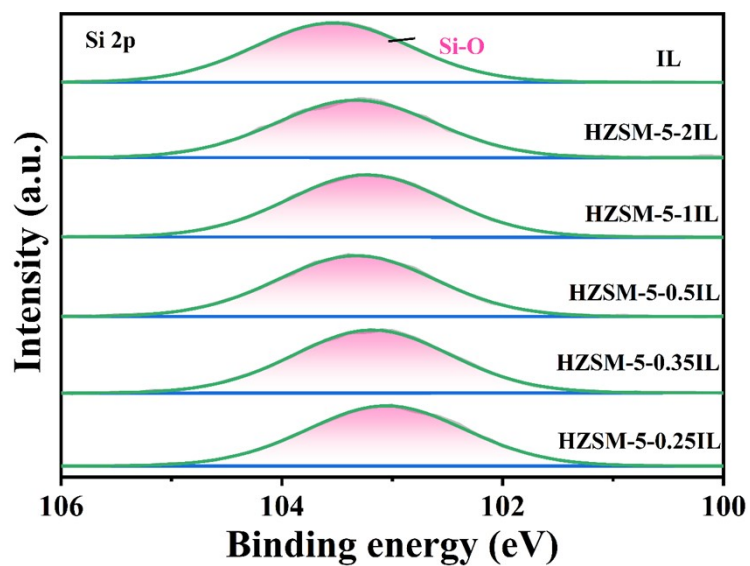

Figure S5. XPS spectra of Si 2p.

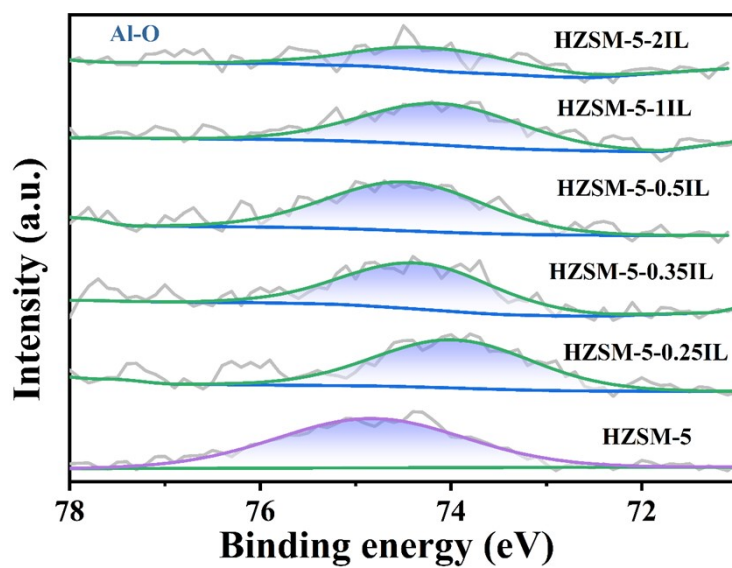

Figure S6. XPS spectra of Al 2p.

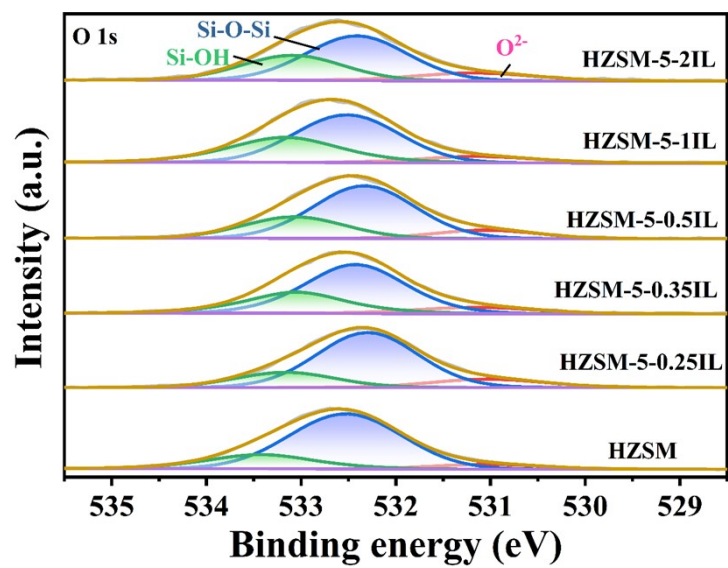

Figure S7. XPS spectra of O 1s.

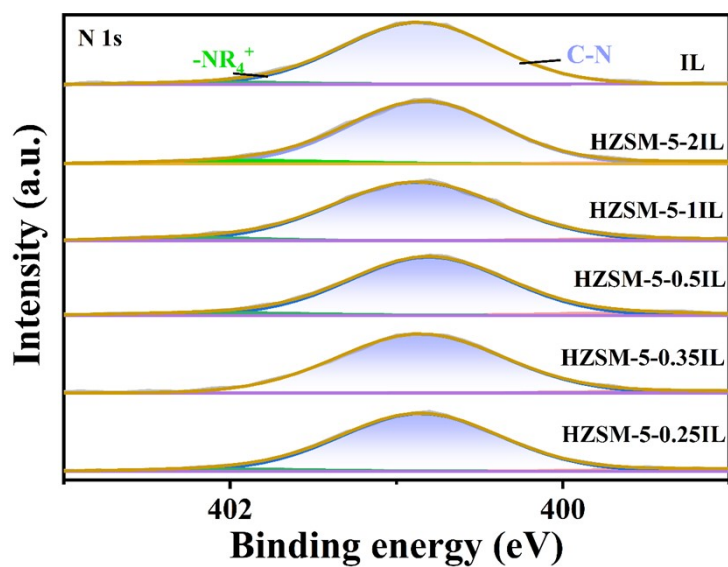

Figure S8. XPS spectra of N 1s.

**Table S2.** Inhibition Zone (mm) of HZSM-5, IL and HZSM-5-nIL composites.

| organism                 | Inhibition Zone diameter (mm) |                   |                   |                  |                |                |       |
|--------------------------|-------------------------------|-------------------|-------------------|------------------|----------------|----------------|-------|
|                          | HZS<br>M-5                    | HZSM-<br>5-0.25IL | HZSM-<br>5-0.35IL | HZSM-<br>5-0.5IL | HZSM-<br>5-1IL | HZSM-<br>5-2IL | IL    |
| <i>S.aureus</i>          | /                             | 26.81             | 28.58             | 32.81            | 32.46          | 47.28          | 28.58 |
| <i>MRSA</i>              | /                             | 24.00             | 26.46             | 34.58            | 30.34          | 58.21          | 26.11 |
| <i>E.Coli</i>            | /                             | 25.40             | 25.75             | 28.58            | 34.22          | 45.16          | 30.69 |
| <i>P.<br/>aeruginosa</i> | /                             | 20.04             | 21.34             | 23.11            | 22.55          | 24.71          | 18.05 |

**Table S3.** MIC and MBC ( $\mu\text{g/ml}$ ) values of HZSM-5, IL and HZSM-5-nIL composites

| organism               |     | HZSM-<br>5 | HZSM-<br>5-0.25IL | HZSM-<br>5-0.35IL | HZSM-<br>5-0.5IL | HZSM-<br>5-1IL | HZSM-<br>5-2IL | IL |
|------------------------|-----|------------|-------------------|-------------------|------------------|----------------|----------------|----|
| <i>E.Coli</i>          | MIC | >2048      | 64                | 32                | 16               | 16             | 8              | 8  |
|                        | MBC | >2048      | 64                | 32                | 16               | 16             | 8              | 16 |
| <i>S.aureus</i>        | MIC | >2048      | 4                 | 4                 | 2                | 2              | 2              | 2  |
|                        | MBC | >2048      | 8                 | 8                 | 4                | 4              | 4              | 4  |
| <i>MRSA</i>            | MIC | >2048      | 32                | 16                | 16               | 8              | 8              | 4  |
|                        | MBC | >2048      | 64                | 16                | 16               | 16             | 8              | 16 |
| <i>P.<br/>aerugino</i> | MIC | >2048      | 256               | 128               | 128              | 128            | 64             | 64 |
|                        | MBC | >2048      | 512               | 256               | 128              | 128            | 64             | 64 |

*sa*

---
